# Supplementary material for: Effect of SiO2-coating of FeK/Al2O3 catalysts on their activity and selectivity for CO2 hydrogenation to hydrocarbons
Source: Royal Society of Chemistry journal article supplement (doi:10.1039/c3ra44485f), 2014-01-01
Supplement: c3ra44485f.pdf [file c3ra44485f.pdf]

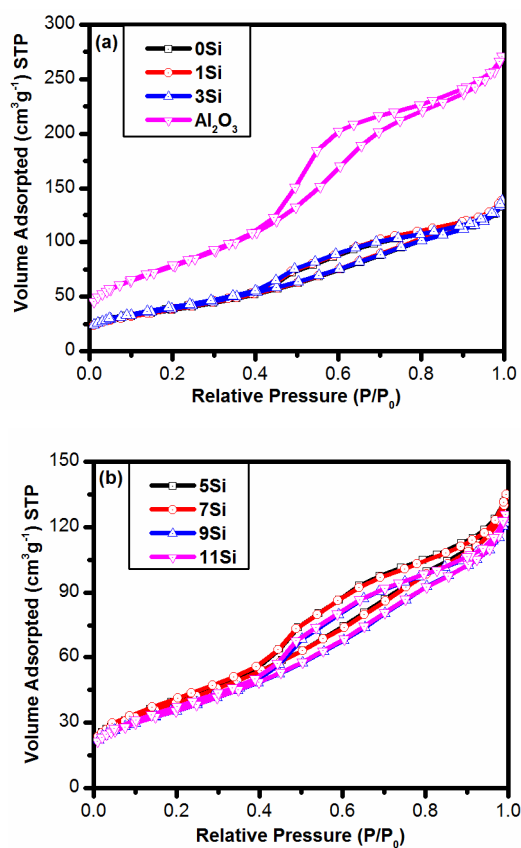

Fig. S1. N<sub>2</sub> adsorption-desorption isotherm of the catalysts.

(a) Al<sub>2</sub>O<sub>3</sub>, 0Si, 1Si, 3Si; (b) 5Si, 7Si, 9Si, 11Si.

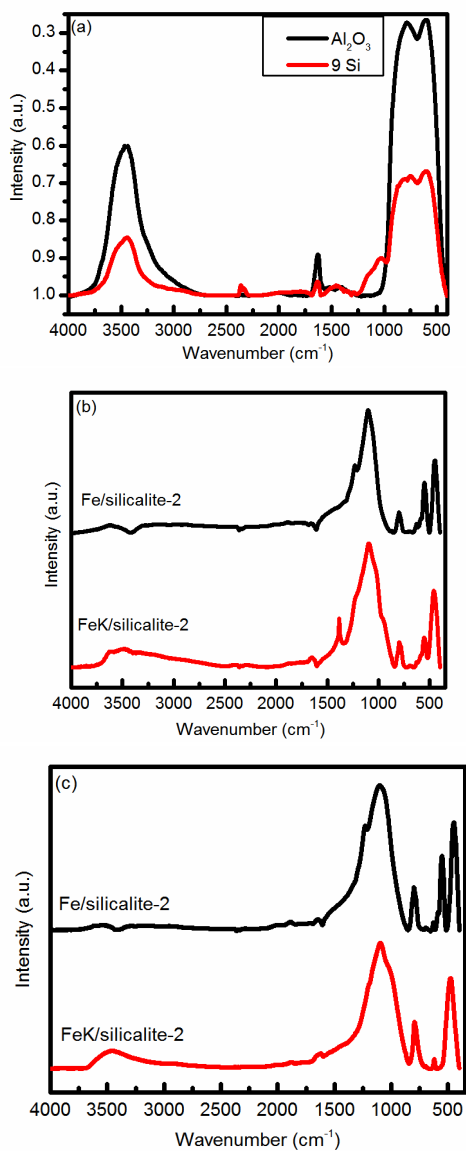

**Fig. S2.** The FT-IR spectra of the samples.

(a) Alumina and TEOS modification of the alumina. (b) Fe(K)/silicalite-2 catalysts as prepared. (c) Fe(K)/silicalite-2 after reaction.

**Table S1** Catalyst activity of the 9Si catalyst in 75 h.<sup>a</sup>

| Time<br>(h) | CO <sub>2</sub><br>conversion<br>(%) | Product Selectivity (%) |                 |                                             |                                             |                  |
|-------------|--------------------------------------|-------------------------|-----------------|---------------------------------------------|---------------------------------------------|------------------|
|             |                                      | CO                      | CH <sub>4</sub> | C <sub>2</sub> ~C <sub>4</sub> <sup>=</sup> | C <sub>2</sub> ~C <sub>4</sub> <sup>o</sup> | C <sub>2</sub> + |
| 1           | 79.7                                 | 6.0                     | 36.6            | 7.8                                         | 16.2                                        | 59.2             |
| 2           | 72.0                                 | 8.4                     | 34.0            | 6.5                                         | 8.6                                         | 57.6             |
| 3           | 73.4                                 | 7.6                     | 27.5            | 22.8                                        | 16.0                                        | 64.9             |
| 4           | 70.8                                 | 7.7                     | 25.8            | 25.4                                        | 15.5                                        | 66.5             |
| 5           | 72.0                                 | 7.7                     | 24.3            | 26.8                                        | 15.7                                        | 68.0             |
| 23          | 70.7                                 | 7.5                     | 20.1            | 31.1                                        | 14.5                                        | 72.3             |
| 24          | 71.6                                 | 9.0                     | 14.9            | 21.0                                        | 10.9                                        | 76.1             |
| 25          | 71.0                                 | 9.7                     | 14.8            | 20.9                                        | 10.8                                        | 75.5             |
| 26          | 70.6                                 | 9.7                     | 15.0            | 21.4                                        | 10.8                                        | 75.3             |
| 28          | 68.8                                 | 10.7                    | 16.1            | 21.9                                        | 11.1                                        | 73.2             |
| 46          | 68.6                                 | 11.7                    | 16.1            | 19.3                                        | 10.7                                        | 72.2             |
| 47          | 68.5                                 | 12.5                    | 15.9            | 19.5                                        | 10.8                                        | 71.9             |
| 48          | 68.3                                 | 12.4                    | 15.5            | 19.9                                        | 11.1                                        | 72.2             |
| 49          | 66.8                                 | 12.4                    | 15.6            | 19.8                                        | 11.0                                        | 72.0             |
| 50          | 67.8                                 | 12.6                    | 16.0            | 19.7                                        | 11.0                                        | 71.4             |
| 71          | 69.0                                 | 12.0                    | 15.6            | 18.6                                        | 10.7                                        | 72.4             |
| 72          | 68.6                                 | 12.8                    | 16.1            | 19.2                                        | 11.1                                        | 71.0             |
| 74          | 64.9                                 | 14.8                    | 16.0            | 17.6                                        | 10.4                                        | 69.2             |
| 75          | 64.8                                 | 16.0                    | 15.5            | 16.9                                        | 10.1                                        | 68.4             |

<sup>a</sup> Reaction conditions: 693 K, 3 Mpa, H<sub>2</sub>/CO<sub>2</sub>=3.0 1800ml g<sup>-1</sup> h<sup>-1</sup>

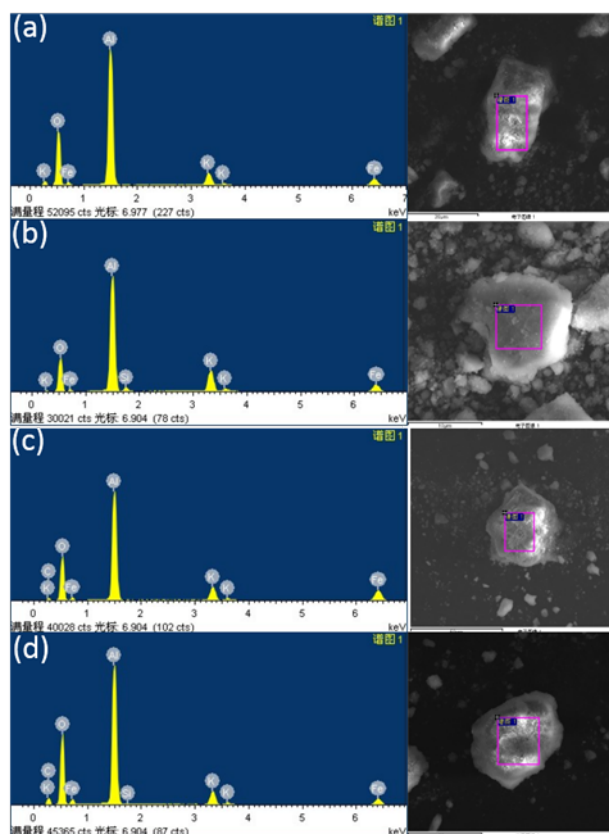

**Fig. S3.** SEM-EDX images of the catalysts.

(a) 0Si, fresh; (b) 9Si, fresh; (c) 0Si, used; (d) 9Si, used.

Table S2. Weight percentage of the elements by SEM-EDX measurement.

| Sample    | Weight percentage (%) |      |      |      |      |      | Total |
|-----------|-----------------------|------|------|------|------|------|-------|
|           | Fe                    | K    | Al   | O    | Si   | C    |       |
| 0Si fresh | 8.7                   | 5.5  | 37.1 | 48.7 | -    | -    | 100   |
| 9Si fresh | 9.8                   | 10.3 | 35.5 | 42.6 | 1.8  | -    | 100   |
| 0Si used  | 12.8                  | 5.7  | 29.6 | 43.5 | -    | 8.4  | 100   |
| 9Si used  | 5.6                   | 4.0  | 25.6 | 49.7 | 0.05 | 15.1 | 100   |

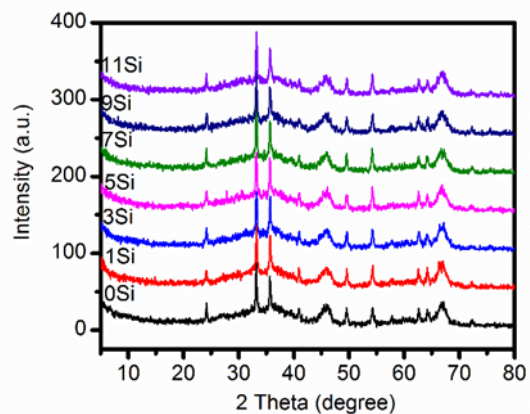

**Fig. S4.** XRD patterns of the fresh catalysts with 0~11% SiO<sub>2</sub>-coating content.

**Table S3.** Morphological features of SiO<sub>2</sub>-coated catalysts.

| Sample | I% of the peak |               | Average crystal size (nm) |
|--------|----------------|---------------|---------------------------|
|        | 33.152° (104)  | 35.611° (110) |                           |
| 0Si    | 100            | 56.1          | 29.2                      |
| 1Si    | 100            | 72.3          | 27.8                      |
| 3Si    | 100            | 86.0          | 25.7                      |
| 5Si    | 100            | 85.7          | 26.3                      |
| 7Si    | 100            | 66.2          | 36.1                      |
| 9Si    | 100            | 60.0          | 31.6                      |
| 11Si   | 100            | 56.1          | 29.2                      |

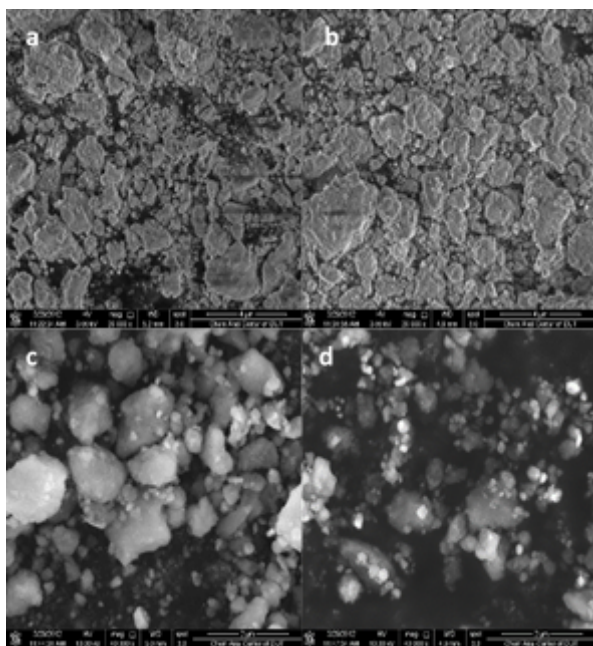

**Fig. S5.** SEM images of the catalysts.

(a) 0Si, fresh; (b) 9Si, fresh; (c) 0Si, used; (d) 9Si, used.

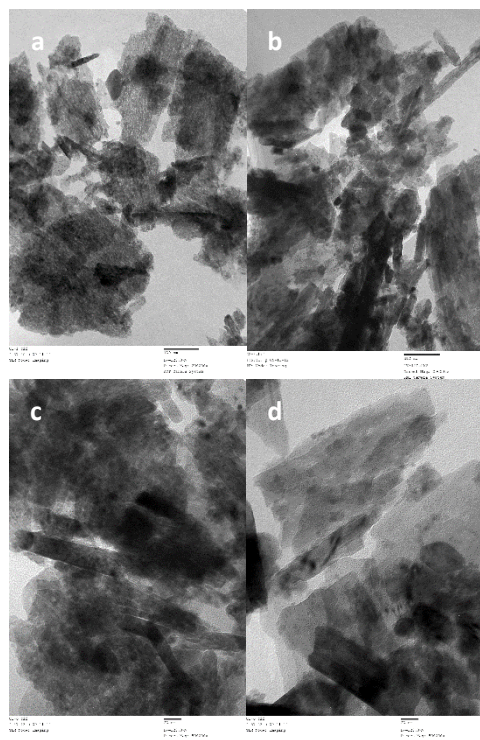

**Fig. S6.** TEM images of the fresh catalysts.

(a) 0Si, 100nm; (b) 9Si, 100nm;

(c) 0Si, 20nm; (d) 9Si, 20nm.

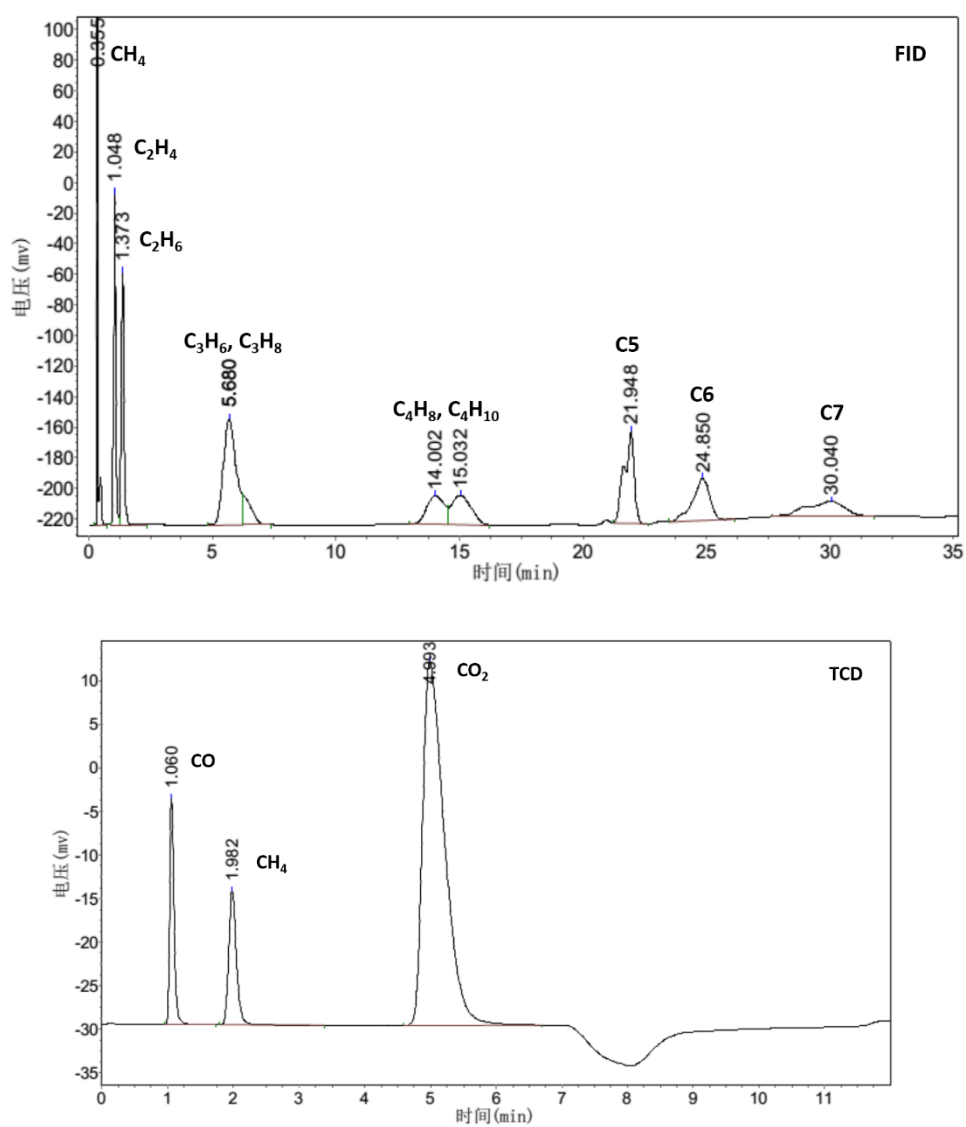

Fig. S7. FID and TCD chromatogram.



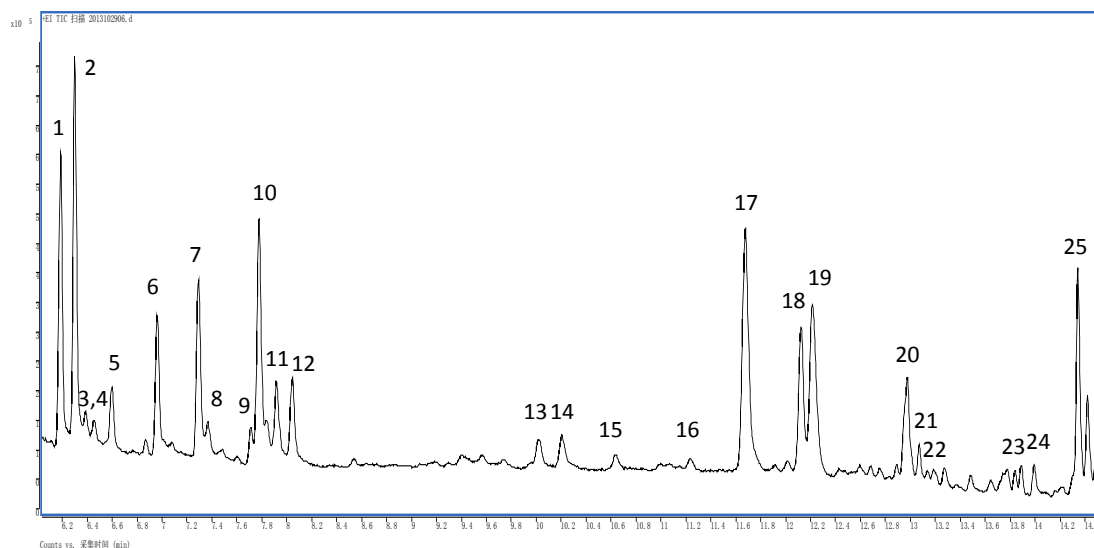

Fig. S7. Total ion chromatogram of the liquid product.

After reaction, the liquid organic product was obtained through extraction with dichloromethane (AR) to remove water. Peaks numbered 5, 7, 10, 17, 19 are organic halide which come from the extraction reagent dichloromethane.

Table S4. Composition of total ion chromatogram.

| Peak | Composition              |
|------|--------------------------|
| 1    | 1-Butanol                |
| 2    | 2-Pentanone              |
| 3    | n-Hexane                 |
| 4    | 3,6-dimethyl-Octan-2-one |
| 6    | 2,4-dimethyl-Heptane     |
| 8    | 2-methyl-1-Butanol       |
| 9    | 4-methyl-Octane          |
| 11   | 1-Pentanol               |
| 12   | 2-Hexanone               |
| 13   | 1-Hexanol                |
| 14   | 2-Heptanone              |
| 15   | Decane                   |
| 16   | 4-methyl-Decane          |
| 18   | 2-methyl-Undecane        |
| 20   | Undecane                 |
| 21   | Dodecane                 |
| 22   | 4-methyl-Undecane        |
| 23   | 2-methyl-Undecane        |
| 24   | 2,3-dimethyl-Undecane    |
| 25   | Tetradecane              |
